# Supplementary material for: Cytokeratin 19 (KRT19) has a Role in the Reprogramming of Cancer Stem Cell-Like Cells to Less Aggressive and More Drug-Sensitive Cells
Source: PubMed Central journal article supplement (PMC5983664; doi:10.3390/ijms19051423), 2018-05-09
Supplement: ijms-19-01423-s001.pdf [file ijms-19-01423-s001.pdf]

## Supplementary Information

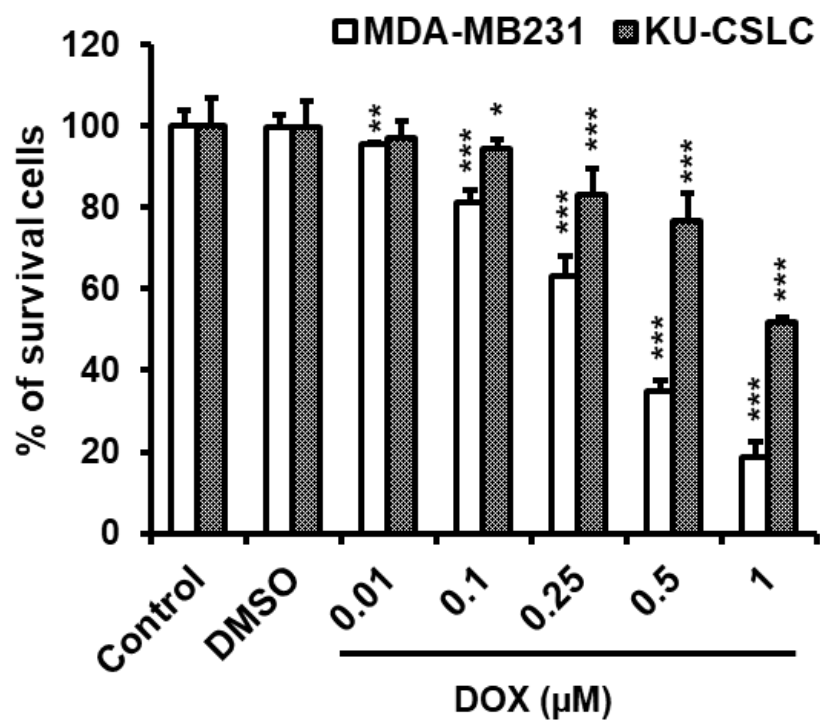

**Figure S1.** The dose dependent effects of doxorubicin (DOX) on cell viability of breast cancer cells. The viability of MDA-MB231 and KU-CSLC cells was determined by EZ-Cytox assay after 48-h exposure to the indicated concentration of DOX. \* $p < 0.05$ ; \*\* $p < 0.01$ ; \*\*\* $p < 0.001$ .
